# Supplementary material for: Down-regulation of CK2α correlates with decreased expression levels of DNA replication minichromosome maintenance protein complex (MCM) genes
Source: PubMed Central journal article supplement (PMC6787000; doi:10.1038/s41598-019-51056-5), 2019-10-10

**Down-regulation of CK2 $\alpha$  correlates with decreased expression levels of DNA replication minichromosome maintenance protein complex (MCM) genes**

Susanne Schaefer, Thomas K. Doktor, Sabrina B. Frederiksen, Kathleen Chea, Mirka Hlavacova, Gitte H. Bruun, Maj Rabjerg, Brage S. Andresen, Isabel Dominguez and Barbara Guerra

## Supplementary Information

### FIGURE LEGENDS

**Figure S1. Expression pattern of MCM3 and MCM4 in mouse embryo heart and somites – negative controls.** (a) Negative controls for MCM3 and MCM4 staining of myocardium sections from E9.5 *WT* embryos. Negative controls for MCM4 revealed some cytoplasmic background signal both in the myocardial wall and trabeculae. (b) Negative controls for MCM3 and MCM4 staining of somite sections from E10.5 *WT* and *KO* mouse embryos.

**Figure S2. Proliferation is diminished in *CK2 $\alpha$* <sup>-/-</sup> embryo hearts.** (a) Whole-mount phospho-histone H3-Ser10 (pH3) immunofluorescence in E9.5 (22-24 somite pairs) and E10 (30 somite pairs) embryos. Photographs also show bright field (BF), pH3 (red) and DAPI staining. White lines delineate heart contour. Fluorescent pictures were pseudo-colored. (b, c) pH3 immunofluorescence staining in heart sections of OFT, ventricles and atria from embryos at (b) E9.5 (22 and 24 somite pairs) and (c) E10 (34 somite pairs). Photographs show bright-field, composite pH3 (red)/DAPI (blue) staining. Fluorescent images were pseudo-colored. Scale bar (b): 50  $\mu$ m, scale bar (c): 100  $\mu$ m. (d) Bar graphs showing mitotic index at E9.5 and E10. Five to seven sections per heart region from three pairs of E9.5 *WT* and *CK2 $\alpha$* <sup>-/-</sup> embryos, and eight to eleven sections per heart region from three pairs of E10.5 *WT* and *CK2 $\alpha$* <sup>-/-</sup> embryos were analyzed. Represented values are mean mitotic index  $\pm$  STDEV. Numbers inside the bars are the total number of cells analyzed in the different heart areas. Asterisks denote statistical significance: \**P*-value

$\leq 0.05$ , \*\**P*-value  $\leq 0.005$ , \*\*\**P*-value  $\leq 0.0005$ . Abbreviations: A (atria); AV (atrioventricular); LV (left ventricle); OFT (outflow tract); OFTe (outflow tract endocardium); OFTm (outflow tract myocardium); RV (right ventricle).

**Table S1.** Significantly down-regulated KEGG pathways following CK2 $\alpha$  silencing

| KEGG pathway                               | CK2 $\alpha$ -shRNA |                 | CK2 $\alpha$ -siRNA |                 | No. of genes in pathway |
|--------------------------------------------|---------------------|-----------------|---------------------|-----------------|-------------------------|
|                                            | <i>P</i> -value     | <i>q</i> -value | <i>P</i> -value     | <i>q</i> -value |                         |
| rno03030 DNA replication                   | 2.98E-10            | 7.82E-08        | 2.42E-06            | 0.000645        | 33                      |
| rno04110 Cell cycle                        | 7.52E-10            | 9.85E-08        | 0.000199            | 0.013235        | 114/115                 |
| rno05322 Systemic lupus erythematosus      | 3.24E-07            | 2.83E-05        | 8.17E-06            | 0.001087        | 56                      |
| rno03430 Mismatch repair                   | 1.54E-06            | 0.000101        | 0.006522            | 0.216869        | 21                      |
| rno03460 Fanconi anemia pathway            | 1.93E-06            | 0.000101        | 0.001038            | 0.046034        | 46                      |
| rno05034 Alcoholism                        | 6.02E-05            | 0.002628        | 0.000407            | 0.021642        | 108/109                 |
| rno03440 Homologous recombination          | 8.26E-05            | 0.003091        | 0.003642            | 0.138394        | 25                      |
| rno00240 Pyrimidine metabolism             | 0.000167            | 0.005454        | 0.015496            | 0.412185        | 85/88                   |
| rno03420 Nucleotide excision repair        | 0.000238            | 0.006939        | 0.081721            | 0.905743        | 42                      |
| rno03013 RNA transport                     | 0.00033             | 0.008417        | 0.369935            | 0.998532        | 139                     |
| rno00100 Steroid biosynthesis              | 0.000353            | 0.008417        | 2.84E-05            | 0.002515        | 18                      |
| rno03040 Spliceosome                       | 0.000937            | 0.020455        | 0.959993            | 0.998532        | 124                     |
| rno03410 Base excision repair              | 0.001091            | 0.021995        | 0.01928             | 0.464968        | 32                      |
| rno05203 Viral carcinogenesis              | 0.001333            | 0.024948        | 0.363486            | 0.998532        | 176                     |
| rno03008 Ribosome biogenesis in eukaryotes | 0.001586            | 0.0277          | 0.16245             | 0.998532        | 72                      |

**Table S2. Significantly differentially expressed genes involved in cell cycle regulation after CK2 $\alpha$  down-regulation**

| Ensembl_ID         | Gene name | Description                                                                      | CK2 $\alpha$ -shRNA          |          |          | CK2 $\alpha$ -siRNA          |          |          |
|--------------------|-----------|----------------------------------------------------------------------------------|------------------------------|----------|----------|------------------------------|----------|----------|
|                    |           |                                                                                  | Log <sub>2</sub> Fold-change | P-value  | padj     | Log <sub>2</sub> Fold-change | P-value  | padj     |
| ENSRNOG0000003703  | Mcm6      | minichromosome maintenance complex component 6 [Source:RGD Symbol;Acc:61967]     | -0.75714                     | 1.66E-43 | 1.08E-40 | -0.68699                     | 4.71E-21 | 1.65E-18 |
| ENSRNOG00000058539 | Ccnb1     | cyclin B1 [Source:RGD Symbol;Acc:2291]                                           | -0.77392                     | 2.60E-33 | 9.64E-31 | -0.8011                      | 2.27E-17 | 4.67E-15 |
| ENSRNOG00000014336 | Mcm5      | minichromosome maintenance complex component 5 [Source:RGD Symbol;Acc:1306616]   | -0.87782                     | 3.11E-32 | 1.12E-29 | -0.9622                      | 2.63E-26 | 1.60E-23 |
| ENSRNOG0000000632  | Cdk1      | cyclin-dependent kinase 1 [Source:RGD Symbol;Acc:2319]                           | -0.68489                     | 6.75E-32 | 2.33E-29 | -0.59044                     | 8.62E-11 | 7.19E-09 |
| ENSRNOG00000028415 | Cdc20     | cell division cycle 20 [Source:RGD Symbol;Acc:620477]                            | -0.80694                     | 1.25E-26 | 3.19E-24 | -0.75992                     | 9.52E-15 | 1.31E-12 |
| ENSRNOG0000001349  | Mcm7      | minichromosome maintenance complex component 7 [Source:RGD Symbol;Acc:1303018]   | -0.57298                     | 7.30E-25 | 1.64E-22 | -0.43775                     | 5.24E-09 | 3.14E-07 |
| ENSRNOG00000010017 | Wee1      | WEE1 G2 checkpoint kinase [Source:RGD Symbol;Acc:1307895]                        | -0.85073                     | 6.01E-24 | 1.25E-21 | -0.7626                      | 2.90E-10 | 2.17E-08 |
| ENSRNOG00000015423 | Ccna2     | cyclin A2 [Source:RGD Symbol;Acc:621059]                                         | -0.7314                      | 6.17E-23 | 1.15E-20 | -0.88799                     | 4.05E-19 | 1.19E-16 |
| ENSRNOG00000032778 | Bub1      | BUB1 mitotic checkpoint serine/threonine kinase [Source:RGD Symbol;Acc:1311707]  | -0.68569                     | 1.31E-22 | 2.40E-20 | -0.65843                     | 3.83E-13 | 4.51E-11 |
| ENSRNOG00000016316 | Mcm2      | minichromosome maintenance complex component 2 [Source:RGD Symbol;Acc:1305577]   | -0.54058                     | 1.12E-21 | 2.01E-19 | -0.5083                      | 1.97E-10 | 1.53E-08 |
| ENSRNOG0000001833  | Mcm4      | minichromosome maintenance complex component 4 [Source:RGD Symbol;Acc:3060]      | -0.59195                     | 3.17E-21 | 5.42E-19 | -0.63094                     | 6.89E-19 | 1.83E-16 |
| ENSRNOG00000029055 | Ttk       | Ttk protein kinase [Source:RGD Symbol;Acc:1305558]                               | -0.72704                     | 4.78E-21 | 7.99E-19 | -0.78776                     | 1.18E-13 | 1.45E-11 |
| ENSRNOG00000012543 | Mcm3      | minichromosome maintenance complex component 3 [Source:RGD Symbol;Acc:1305168]   | -0.64377                     | 6.62E-21 | 1.09E-18 | -0.71333                     | 1.32E-17 | 2.75E-15 |
| ENSRNOG00000014786 | Ccne1     | cyclin E1 [Source:RGD Symbol;Acc:2294]                                           | -0.59781                     | 1.24E-17 | 1.59E-15 | -0.32873                     | 0.000104 | 0.002306 |
| ENSRNOG00000009867 | Tgfb3     | transforming growth factor, beta 3 [Source:RGD Symbol;Acc:3851]                  | -0.42481                     | 1.29E-17 | 1.63E-15 | 0.108653                     | 0.222859 | 0.595916 |
| ENSRNOG00000007906 | Bub1b     | BUB1 mitotic checkpoint serine/threonine kinase B [Source:RGD Symbol;Acc:619791] | -0.63158                     | 1.74E-13 | 1.64E-11 | -0.63509                     | 2.26E-07 | 9.71E-06 |
| ENSRNOG00000021264 | Pcna      | proliferating cell nuclear antigen [Source:RGD Symbol;Acc:3269]                  | -0.36135                     | 5.93E-13 | 5.20E-11 | -0.45828                     | 4.36E-11 | 3.79E-09 |
| ENSRNOG00000005376 | Mad2l1    | MAD2 mitotic arrest deficient-like 1 (yeast) [Source:RGD Symbol;Acc:1310889]     | -0.65225                     | 1.06E-12 | 8.98E-11 | -0.6286                      | 4.70E-11 | 4.05E-09 |
| ENSRNOG00000002418 | Tgfb2     | transforming growth factor, beta 2 [Source:RGD Symbol;Acc:70491]                 | -0.33439                     | 5.32E-12 | 4.17E-10 | 0.317567                     | 8.69E-07 | 3.30E-05 |
| ENSRNOG00000027787 | Cdc6      | cell division cycle 6 [Source:RGD Symbol;Acc:1309157]                            | -0.60732                     | 3.28E-10 | 2.10E-08 | -0.93183                     | 6.55E-16 | 1.09E-13 |
| ENSRNOG00000008055 | Ccne2     | cyclin E2 [Source:RGD Symbol;Acc:1307783]                                        | -0.57667                     | 3.22E-09 | 1.79E-07 | -0.43891                     | 8.01E-05 | 0.001825 |
| ENSRNOG00000016708 | E2f1      | E2F transcription factor 1 [Source:RGD Symbol;Acc:728892]                        | -0.47787                     | 8.22E-09 | 4.32E-07 | -0.57003                     | 4.74E-08 | 2.31E-06 |
| ENSRNOG00000007249 | Cdkn1b    | cyclin-dependent kinase inhibitor 1B [Source:RGD Symbol;Acc:69062]               | 0.40501                      | 8.92E-09 | 4.64E-07 | 0.030421                     | 0.833783 | 0.960209 |
| ENSRNOG00000006469 | Cdk2      | cyclin dependent kinase 2 [Source:RGD Symbol;Acc:70486]                          | -0.42184                     | 3.51E-08 | 1.66E-06 | -0.38348                     | 1.81E-05 | 0.000494 |
| ENSRNOG00000018815 | Plk1      | polo-like kinase 1 [Source:RGD Symbol;Acc:3352]                                  | -0.48325                     | 1.82E-07 | 7.78E-06 | -0.1957                      | 0.29473  | 0.668792 |
| ENSRNOG00000003802 | Pttg1     | pituitary tumor-transforming 1 [Source:RGD Symbol;Acc:68359]                     | -0.54822                     | 6.27E-07 | 2.38E-05 | -0.65373                     | 2.77E-05 | 0.000724 |
| ENSRNOG00000006921 | Rbl1      | retinoblastoma-like 1 [Source:RGD Symbol;Acc:1595511]                            | -0.45231                     | 8.75E-07 | 3.16E-05 | -0.6004                      | 1.33E-07 | 6.02E-06 |
| ENSRNOG00000024043 | Orc6      | origin recognition complex, subunit 6 [Source:RGD Symbol;Acc:1311437]            | -0.41589                     | 1.07E-06 | 3.80E-05 | -0.14468                     | 0.192646 | 0.55644  |

|                     |         |                                                                                                          |          |          |           |          |          |          |
|---------------------|---------|----------------------------------------------------------------------------------------------------------|----------|----------|-----------|----------|----------|----------|
| ENSRNOG00000059837  | Cdkn2a  | cyclin-dependent kinase inhibitor 2A [Source:RGD Symbol;Acc:2323]                                        | -0.49048 | 1.81E-06 | 6.07E-05  | 0.418319 | 1.97E-06 | 6.78E-05 |
| ENSRNOG00000050071  | Cdc45   | cell division cycle 45 [Source:RGD Symbol;Acc:1590928]                                                   | -0.53947 | 2.27E-06 | 7.46E-05  | -0.76638 | 3.90E-08 | 1.93E-06 |
| ENSRNOG00000029773  | Atm     | ATM serine/threonine kinase [Source:RGD Symbol;Acc:1593265]                                              | -0.27703 | 1.61E-05 | 0.00044   | 0.045675 | 0.703367 | 0.914532 |
| ENSRNOG00000012835  | Espl1   | extra spindle pole bodies like 1, separase [Source:RGD Symbol;Acc:1306266]                               | -0.40643 | 3.21E-05 | 0.000809  | -0.32944 | 0.064952 | 0.312772 |
| ENSRNOG00000024008  | Cdc25c  | cell division cycle 25C [Source:RGD Symbol;Acc:1311875]                                                  | -0.37252 | 5.52E-05 | 0.001316  | -0.03979 | 0.723073 | 0.920147 |
| ENSRNOG00000003657  | Pkmyt1  | protein kinase, membrane associated tyrosine/threonine 1 [Source:RGD Symbol;Acc:1305434]                 | -0.51486 | 5.89E-05 | 0.001394  | -0.46088 | 0.001598 | 0.022235 |
| ENSRNOG00000010027  | Atr     | ATR serine/threonine kinase [Source:RGD Symbol;Acc:1305796]                                              | -0.25188 | 0.000148 | 0.00309   | -0.21086 | 0.075174 | 0.338302 |
| ENSRNOG00000029785  | Cdc26   | cell division cycle 26 [Source:RGD Symbol;Acc:1311342]                                                   | -0.27909 | 0.000215 | 0.004261  | -0.07509 | 0.389727 | 0.750466 |
| ENSRNOG00000059059  | Skp2    | S-phase kinase-associated protein 2, E3 ubiquitin protein ligase [Source:RGD Symbol;Acc:1562456]         | -0.28175 | 0.000263 | 0.005023  | -0.4879  | 1.17E-07 | 5.39E-06 |
| ENSRNOG00000001265  | Mad11l  | MAD1 mitotic arrest deficient-like 1 (yeast) [Source:RGD Symbol;Acc:1596881]                             | -0.27412 | 0.000295 | 0.005568  | -0.04795 | 0.629858 | 0.886049 |
| ENSRNOG00000008841  | Orc1    | origin recognition complex, subunit 1 [Source:RGD Symbol;Acc:631435]                                     | -0.45268 | 0.00031  | 0.005803  | -0.69003 | 1.99E-06 | 6.84E-05 |
| ENSRNOG00000004420  | Rad21   | RAD21 cohesin complex component [Source:RGD Symbol;Acc:1594529]                                          | -0.13776 | 0.001171 | 0.017391  | -0.16192 | 0.154133 | 0.496409 |
| ENSRNOG00000005828  | Skp1    | S-phase kinase-associated protein 1 [Source:RGD Symbol;Acc:1359648]                                      | 0.120802 | 0.001503 | 0.021253  | 0.061684 | 0.507349 | 0.826882 |
| ENSRNOG000000055471 | Ywhah   | tyrosine 3-monooxygenase/tryptophan 5-monooxygenase activation protein, eta [Source:RGD Symbol;Acc:3978] | -0.18215 | 0.001546 | 0.021757  | -0.10504 | 0.429314 | 0.774881 |
| ENSRNOG00000009258  | Cdk6    | cyclin-dependent kinase 6 [Source:RGD Symbol;Acc:621121]                                                 | -0.22948 | 0.002575 | 0.032749  | 0.026596 | 0.768633 | 0.937303 |
| ENSRNOG000000057710 | Ccnd2   | cyclin D2 [Source:RGD Symbol;Acc:621083]                                                                 | -0.12587 | 0.004844 | 0.053968* | 0.078155 | 0.252176 | 0.62761  |
| ENSRNOG00000013090  | Gadd45g | growth arrest and DNA-damage-inducible, gamma [Source:RGD Symbol;Acc:1311796]                            | -0.16981 | 0.01092  | 0.096437  | 0.343063 | 1.87E-05 | 0.000508 |
| ENSRNOG00000047741  | E2f2    | E2F transcription factor 2 [Source:RGD Symbol;Acc:1593939]                                               | -0.17979 | 0.129662 | 0.469777  | -0.98085 | 2.71E-14 | 3.56E-12 |
| ENSRNOG00000006735  | Cdkn2b  | cyclin-dependent kinase inhibitor 2B (p15, inhibits CDK4) [Source:RGD Symbol;Acc:2324]                   | -0.01014 | 0.919935 | 0.984378  | 0.565259 | 3.30E-13 | 3.96E-11 |
| ENSRNOG00000006304  | Mdm2    | MDM2 proto-oncogene, E3 ubiquitin protein ligase [Source:RGD Symbol;Acc:1305332]                         | 0.010698 | 0.822452 | 0.963231  | 0.364602 | 1.64E-06 | 5.82E-05 |
| ENSRNOG00000019822  | Gadd45b | growth arrest and DNA-damage-inducible, beta [Source:RGD Symbol;Acc:1309080]                             | -0.07291 | 0.125509 | 0.462163  | 0.326492 | 3.42E-05 | 0.000868 |
| ENSRNOG00000005904  | Cdc27   | cell division cycle 27 [Source:RGD Symbol;Acc:1304921]                                                   | -0.06491 | 0.226996 | 0.616278  | -0.25417 | 0.000291 | 0.005572 |
| ENSRNOG00000012153  | Rbl2    | retinoblastoma-like 2 [Source:RGD Symbol;Acc:3541]                                                       | 0.139961 | 0.048628 | 0.264089  | -0.31504 | 0.000306 | 0.005777 |
| ENSRNOG00000020737  | Cdc25a  | cell division cycle 25A [Source:RGD Symbol;Acc:621498]                                                   | -0.19788 | 0.016197 | 0.1278    | -0.29728 | 0.002145 | 0.028157 |
| ENSRNOG00000011241  | Tfdp2   | transcription factor Dp-2 (E2F dimerization partner 2) [Source:RGD Symbol;Acc:1305814]                   | -0.09599 | 0.462709 | 0.814209  | -0.38345 | 0.003675 | 0.042538 |
| ENSRNOG000000058914 | Rbx1    | ring-box 1, E3 ubiquitin protein ligase [Source:RGD Symbol;Acc:1308453]                                  | -0.0612  | 0.299581 | 0.693535  | 0.229623 | 0.004098 | 0.046069 |
| ENSRNOG00000008459  | Anapc13 | anaphase promoting complex subunit 13 [Source:RGD Symbol;Acc:1583270]                                    | 0.110976 | 0.202609 | 0.584367* | 0.322565 | 0.005116 | 0.055068 |

\*padj values close to the set threshold

**Table S3.** Apoptotic index in E10.5 *CK2a*<sup>-/-</sup> embryos. Four to six sections per heart region from two pairs of *WT* and *CK2a*<sup>-/-</sup> embryos were analyzed. Columns display the total number of cells analyzed in the different heart areas (DAPI+), the number of TUNEL+ cells in those areas and the calculated apoptotic index (TUNEL+/DAPI+ cells). Abbreviations: AV (atrio-ventricular); A (atria); LV (left ventricle); OFT (outflow tract); RV (right ventricle).

|                 | <b>Genotype</b> | <b>Total cell number (DAPI+ cells)</b> | <b>Total TUNEL+ cells</b> | <b>Apoptotic index (%)</b> |
|-----------------|-----------------|----------------------------------------|---------------------------|----------------------------|
| OFT myocardium  | +/+             | 1269                                   | 3                         | 0.23                       |
|                 | -/-             | 971                                    | 0                         | 0                          |
| OFT endocardium | +/+             | 1353                                   | 2                         | 0.14                       |
|                 | -/-             | 750                                    | 1                         | 0.13                       |
| RV              | +/+             | 4356                                   | 2                         | 0.04                       |
|                 | -/-             | 1738                                   | 0                         | 0                          |
| LV              | +/+             | 5967                                   | 7                         | 0.11                       |
|                 | -/-             | 5510                                   | 5                         | 0.09                       |
| AV cushion      | +/+             | 1205                                   | 2                         | 0.16                       |
|                 | -/-             | 1214                                   | 3                         | 0.24                       |
| A               | +/+             | 3336                                   | 2                         | 0.05                       |
|                 | -/-             | 3090                                   | 5                         | 0.16                       |

**Table S4.** Sequences for forward and reverse primers used in the study

| <b>Gene</b>                     | <b>Forward</b>            | <b>Reversed</b>        |
|---------------------------------|---------------------------|------------------------|
| <i>Cct2</i>                     | CATCAAAGCGGCACCAAGGAAA    | TTCAACAGCAAATGGGAATGCT |
| <i>Vim</i>                      | GGAGGAGATGAGGGAGTTGC      | CCTCCTGCAATTTTTCTCGCA  |
| <i>Mcm2</i>                     | AGAACCCAGGTGGAAAGCAC      | TGGTGAAAATGGCACGGCTA   |
| <i>Mcm3</i>                     | AACCCGTTCCAAGGATGTCT      | CCAGGAGCAAGCAGAGGATT   |
| <i>Mcm4</i>                     | GGGACAATCTGACACAGCAAT     | TCAGAGTAGGCGGACAGTCT   |
| <i>Mcm5</i>                     | AAGAAGTTTGGCATGAACCCC     | CATCTGGGAGCCAGAACCATCT |
| <i>Mcm6</i>                     | GAGACAGAAGGCATCCGAGG      | TCCCTCCAAATCGTGGGTTG   |
| <i>Mcm7</i>                     | AGGACTATGCGATTGAGAAAGAAAA | ACTTGTTCCCGATGAGCCAG   |
| <i>Pol<math>\delta</math>1</i>  | AAGCTGCCGTGTTTGGAGAT      | AGACCACCTTGGCATTAGCA   |
| <i>Pol<math>\epsilon</math></i> | ACAGTTCTTGCCACAGGCAG      | CAGCCACGATGTATGCTGAA   |



Suppl. Figure S1

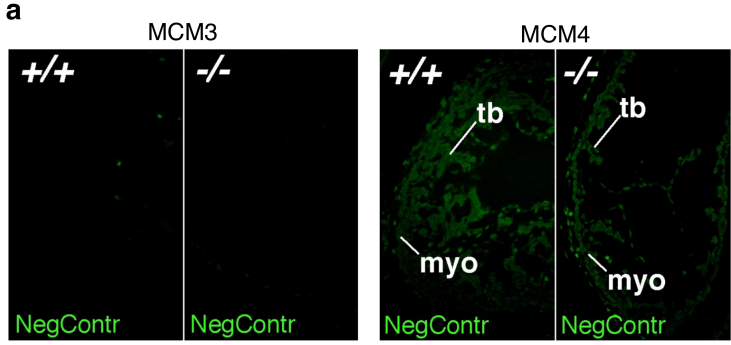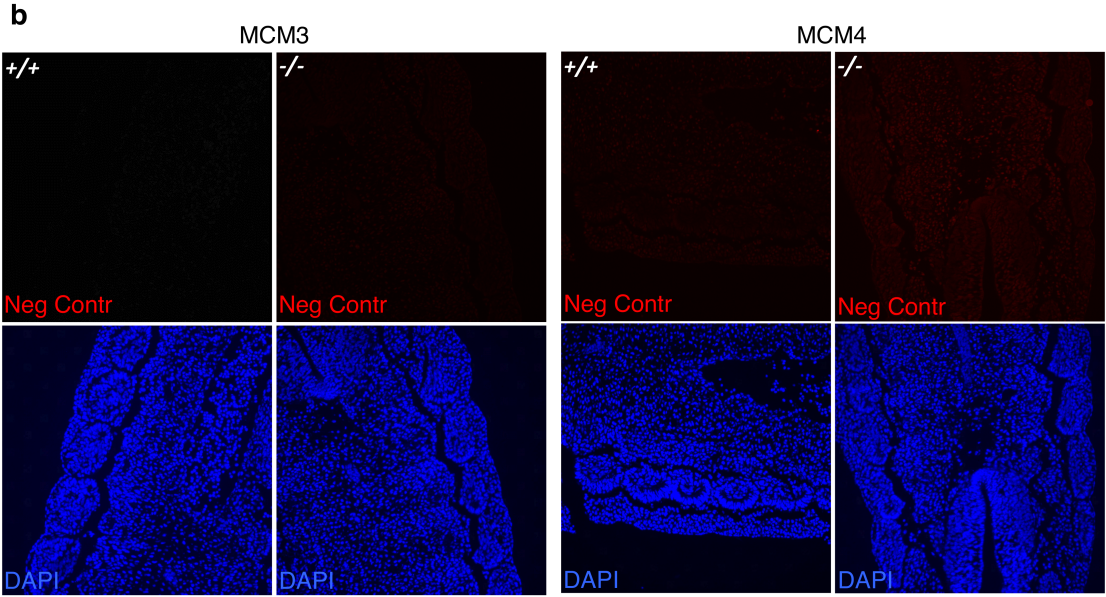

Suppl. Figure S2

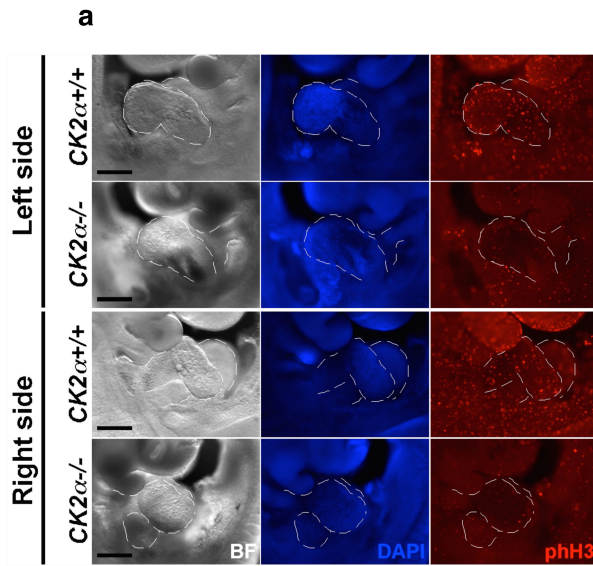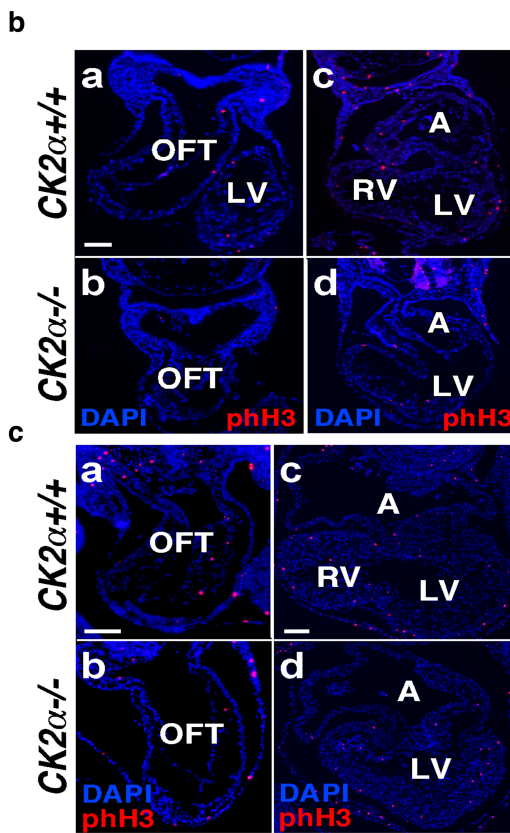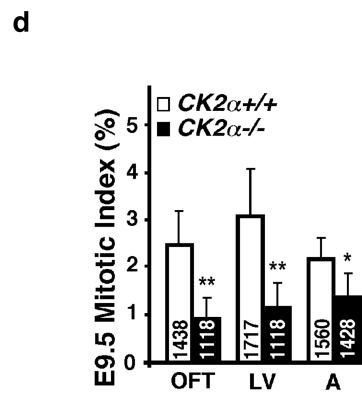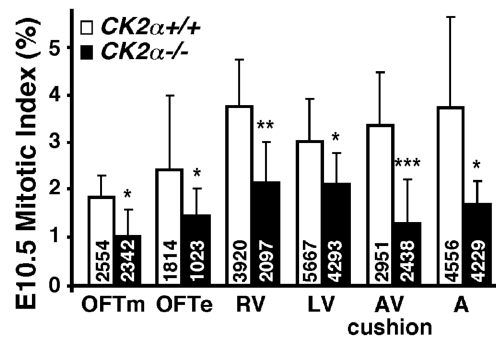

1d

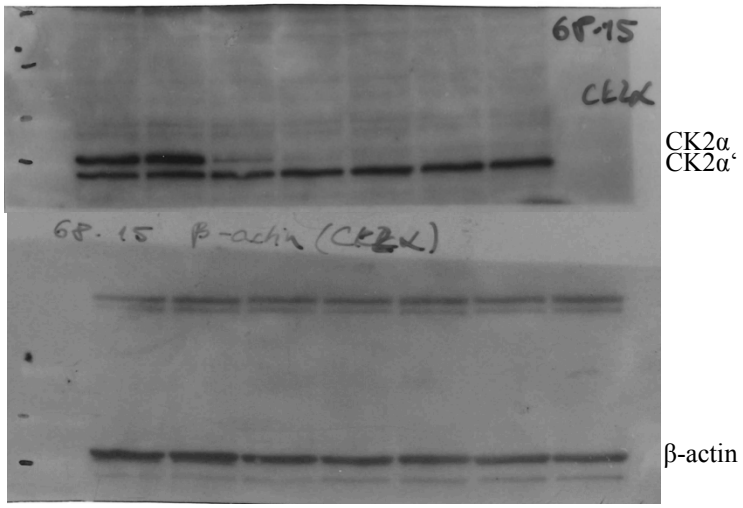

1e

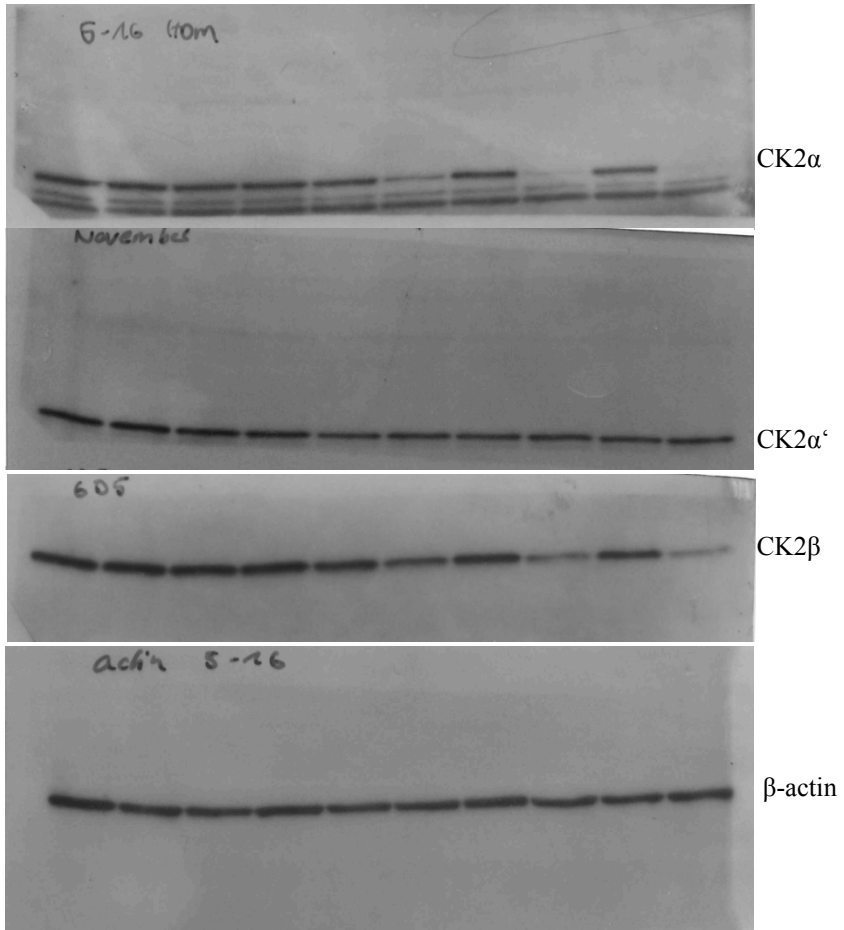

1f

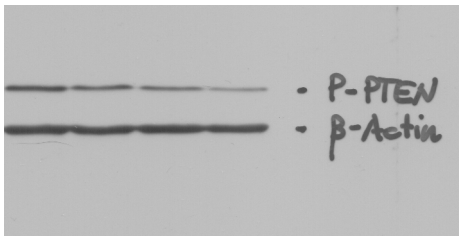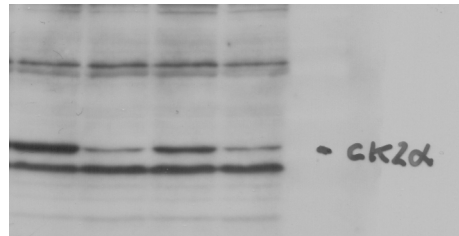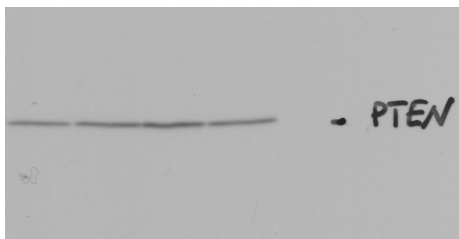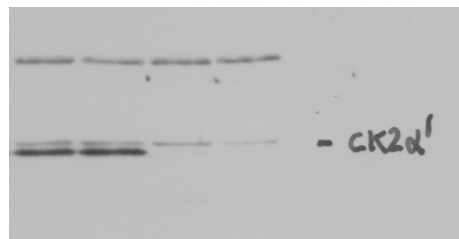

cyclin E

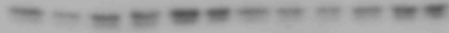

CK2 $\alpha$

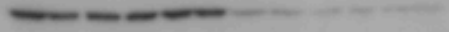

$\beta$ -actin

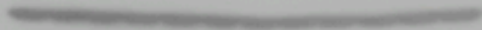

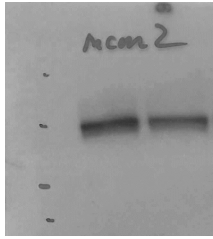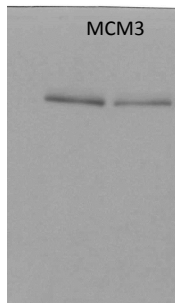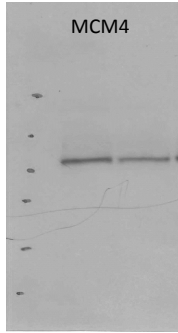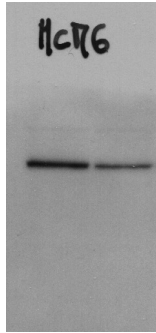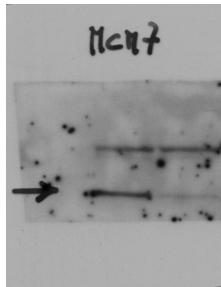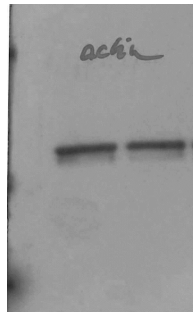

Supplement: 41598_2019_51056_MOESM1_ESM.pdf [file 41598_2019_51056_MOESM1_ESM.pdf]
